# Supplementary material for: Extracellular Matrix and Fibrocyte Accumulation in BALB/c Mouse Lung upon Transient Overexpression of Oncostatin M
Source: MDPI journal article supplement (doi:10.3390/cells8020126), 2019-02-05
Supplement: s1 [file s1]

# Supplementary Figure 1

A

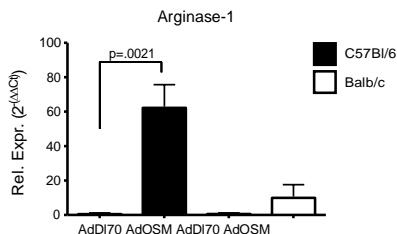

B

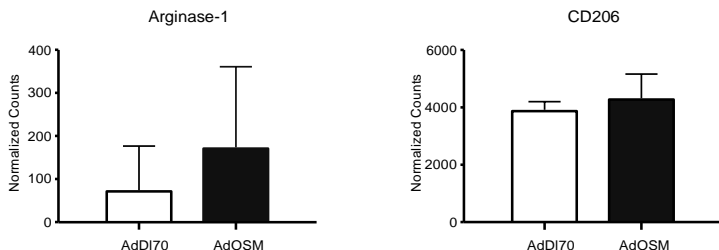

**Supplementary Figure 1.** Expression of Arginase-1 in mouse whole lung and Arginase-1 and CD206 in alveolar macrophages. **(A)** Wildtype C57Bl/6 or BALB/c mice were endotracheally administered AdDI70 or AdOSM ( $5 \times 10^7$  pfu), culled after 7 days and lung tissues isolated and prepared for RNA extraction. RNA was probed for Arginase-1 by quantitative PCR. **(B)** Alveolar macrophages were isolated, as previously described (49), from the lungs of BALB/c mice treated with AdDI70 or AdOSM (as described in (A)) and RNA extracted and probed for expression of Arginase-1 and CD206 was assayed using Nanostring technology (Nanostring Technologies, Seattle, WA). Data is shown as the mean  $\pm$  SEM ( $n = 5$  per group). Statistical significant differences are noted with their  $p$  values between the indicated treatment groups.
